# Supplementary material for: Identification of hub genes and potential molecular mechanisms related to radiotherapy sensitivity in rectal cancer based on multiple datasets
Source: PubMed Central journal article supplement (PMC9987056; doi:10.1186/s12967-023-04029-2), 2023-03-06
Supplement: 12967_2023_4029_MOESM1_ESM.pdf [file 12967_2023_4029_MOESM1_ESM.pdf]

**Identification of hub genes and potential molecular mechanisms related to  
radiotherapy sensitivity in rectal cancer based on multiple datasets**

Pengfei Zhao<sup>1</sup>, Hongchao Zhen<sup>2</sup>, Hong Zhao<sup>1</sup>, Yongjie Huang<sup>1</sup>, Bangwei Cao<sup>2#</sup>

<sup>1</sup>Department of Radiotherapy, Beijing Friendship Hospital, Capital Medical University,  
Beijing 100050, P.R. China.

<sup>2</sup>Department of Oncology, Beijing Friendship Hospital, Capital Medical University,  
Beijing 100050, P.R. China.

## Supplementary Figures and Legends

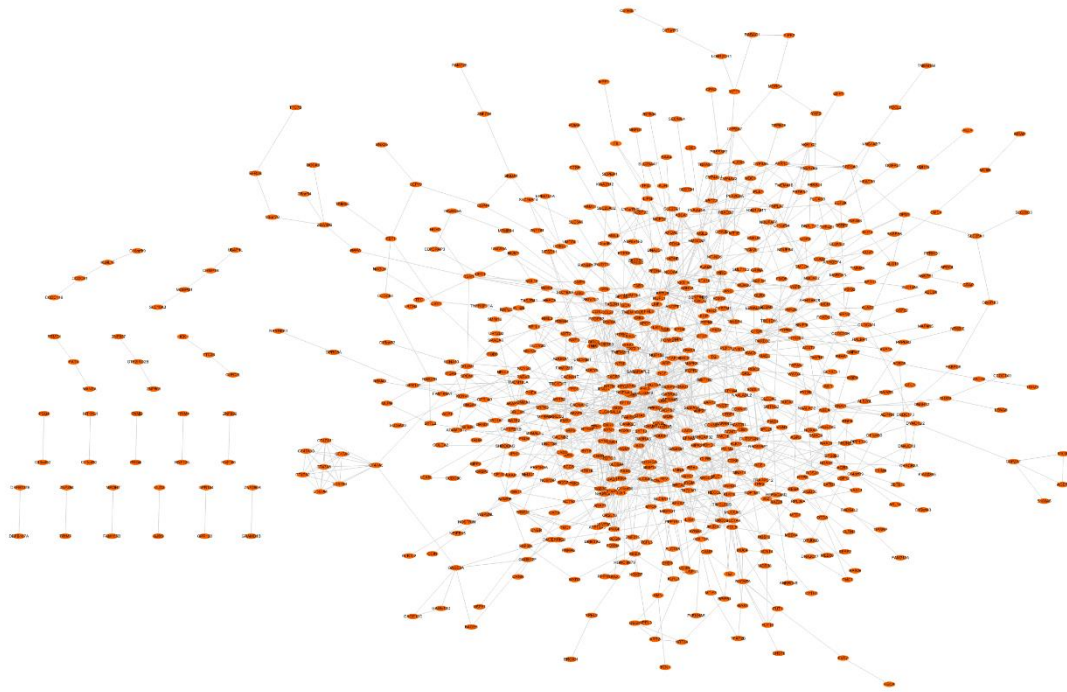

**Supplementary Figure 1.** Functional enrichment of DEGs by metascape enrichment analysis.

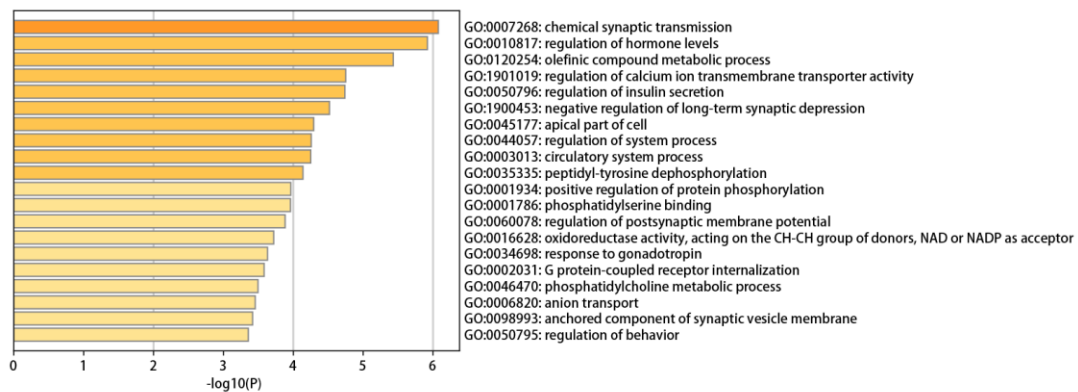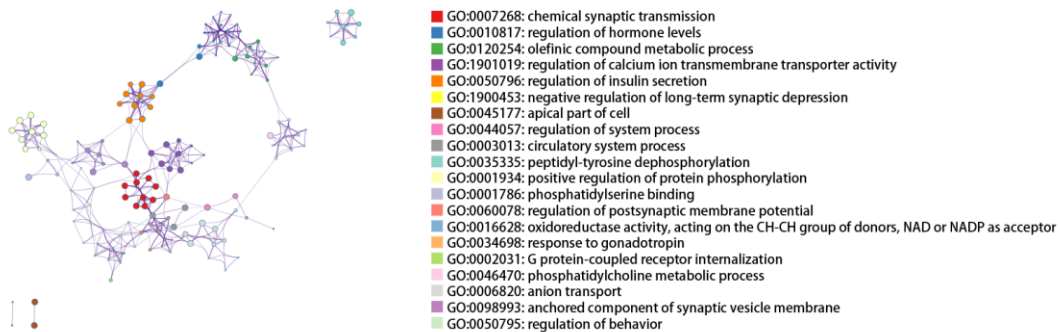

**Supplementary Figure 2.** Protein interaction network analysis of DEGs by Cytoscape



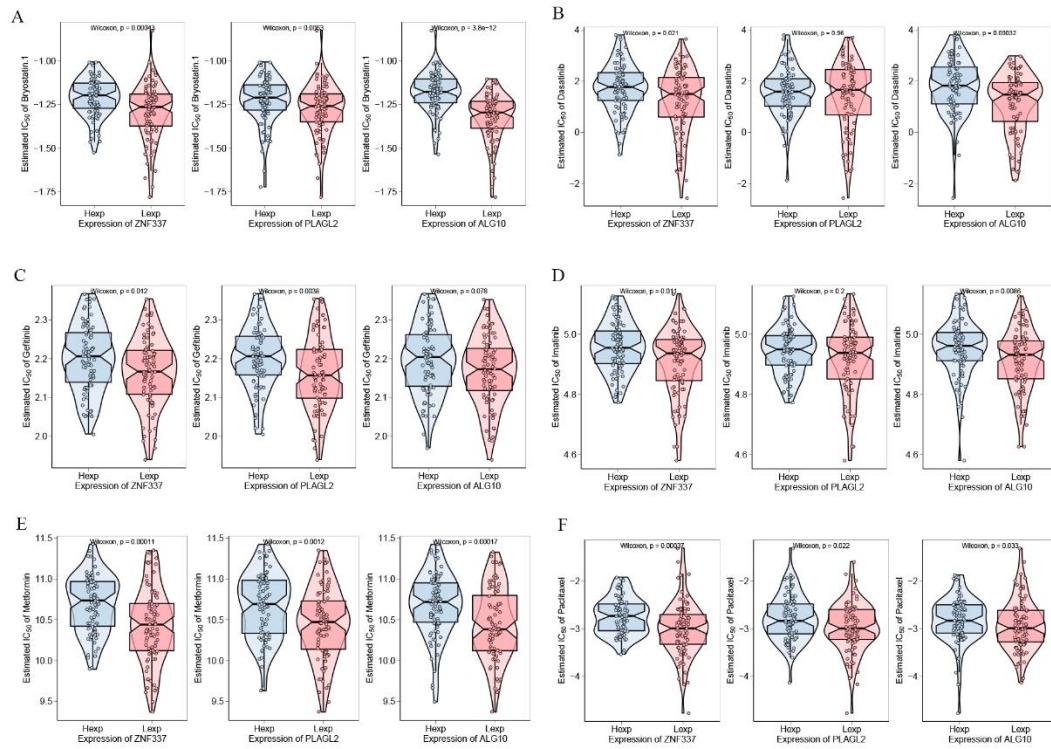

**Supplementary Figure 4.** The sensitivity analysis of chemotherapeutic drugs between different expression levels of key genes based on GDSC database. A: Bryostatin.1; B: Dasatinib; C: Gefitinib; D: Imatinib; E: Metformin; F: Paclitaxel.

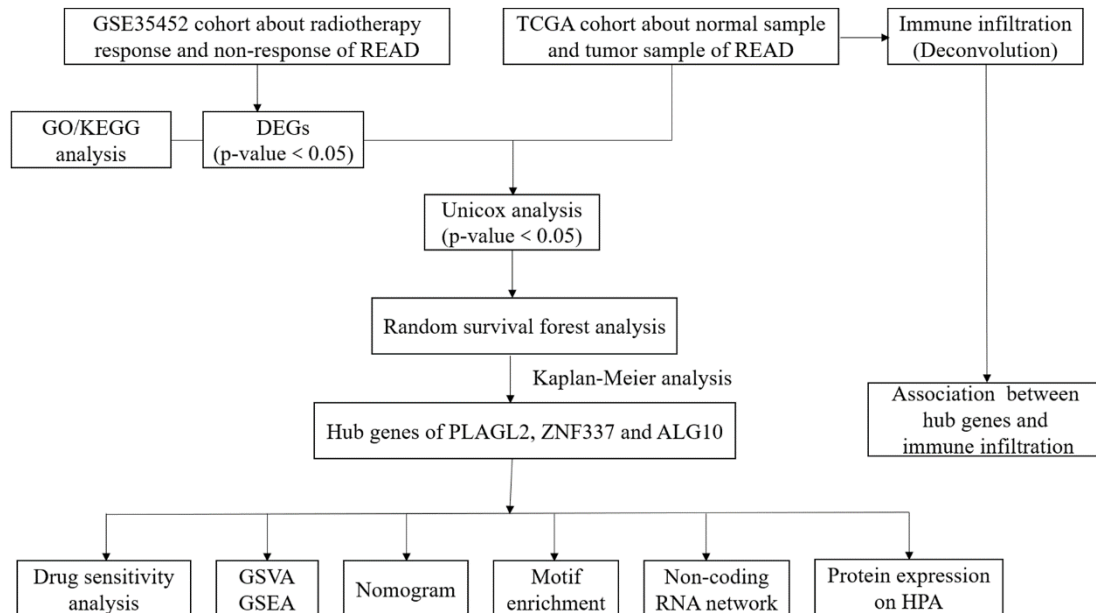

**Supplementary Figure 5.** The flowchart of the current study.

## Supplemental Table

**Supplementary Table 1.** Information of the DEGs identified from database. A total of 1119 DEGs were identified from GSE35452 dataset, including 544 up-regulated genes and 575 down-regulated genes in READ cohort.

| DEGs                         | Gene name                                                                                                                                                                                                                                                                                                                                                                                                                                                                                                                                                                                                                                                                                                                                                                                                                                                                                                                                                                                                                                                                                                                                                                                                                                                                                                                                                                                                                                                                                                                                                                                                                                                                                                                                                                                                                                                                                                |
|------------------------------|----------------------------------------------------------------------------------------------------------------------------------------------------------------------------------------------------------------------------------------------------------------------------------------------------------------------------------------------------------------------------------------------------------------------------------------------------------------------------------------------------------------------------------------------------------------------------------------------------------------------------------------------------------------------------------------------------------------------------------------------------------------------------------------------------------------------------------------------------------------------------------------------------------------------------------------------------------------------------------------------------------------------------------------------------------------------------------------------------------------------------------------------------------------------------------------------------------------------------------------------------------------------------------------------------------------------------------------------------------------------------------------------------------------------------------------------------------------------------------------------------------------------------------------------------------------------------------------------------------------------------------------------------------------------------------------------------------------------------------------------------------------------------------------------------------------------------------------------------------------------------------------------------------|
| <b>Upregulated<br/>(544)</b> | LOC100131756, LRRIQ3, LOC101927151, BRCA2, RP11-495P10.9, RP3-522P13.1, UMODL1, C10orf62, MED14OS, LHX8, LOC101928401, SPACA3, DRD3, ENKUR, LOC101928288, CSMD2-AS1, RECQL, TMC1, TRA@, MTNR1B, SEMA3A, GABRA6, SPATC1, SNX25, STX16, RP11-171N4.1, UNC93A, LIG4, LOC284865, TRHR, MTCPI, B3GALTL, LOC100506538, LOC101926912, RP11-356B19.11, SLC6A4, LOC149373, C5orf64, PTPN11, LOC284939, LINC00424, C18orf15, RP11-585P4.5, LOC283075, USP12, GTF2IRD2B, NAA11, LINC01206, SYN1, C7orf25, DIAPH3, SCPEP1, RNF166, FAM230B, UQCC2, RP11-66N11.8, PALM, LINC00116, VAPB, GPR132, TRIM65, SLC26A4-AS1, KIR2DL2, FOXK1, LOC101929025, TPP2, LOC284798, CXCR3, OR51A10P, CMC4, RP11-1012E15.1, MANEA, RNF6, ANGPT1, KCNV1, CYP2A7, PFDN4, LINC00593, MTIF3, LOC729461, SPATC1L, MRGPRX4, LINC01348, PIPOX, CCND2, ZFP1, KLHL18, LINC00052, LINC01424, LINC00703, LOC101927988, MMP27, LOC101928545, YAF2, NRTN, RBM41, POLB, DOCK9, EDARADD, LOC101929289, CTB-78F1.1, LOC100271832, GPR107, GCNT4, GABRB1, PLB1, LINC01420, LOC101929709, HM13, LRRC37BP1, LOC101927650, TUSC8, AC064852.4, PPIAL4B, PPIAL4C, PPIAL4G, C14orf39, SNORD3A, SNORD3B-1, SNORD3B-2, SNORD3C, SNORD3D, LINC00323, DTD1, GRINA, FAM200A, UBD, LINC00461, MIR9-2, NAALAD2, SLC10A3, GS1-164F24.1, CXCL11, DEFB107A, DEFB107B, C10orf53, RP11-498C9.17, RFPL2, ADCY5, PHF2P1, LOC101929248, ZNF92, MED14, POU5F1, BC037833, RP11-492E3.2, LOC100652824, MIR3934, TCP11L1, FAM72A, FAM72B, FAM72C, FAM72D, SKIL, OR11A1, DDAH1, TMPRSS11B, EFR3B, PDGFRA, LOC101928435, LOC101927003, BC031255, RP11-260O18.1, NKAP, LOC101928446, ZNF280B, CYP4A11, CEP44, PARVB, RP11-360K13.1, CIDCEP, AGER, MED30, BMP15, TGIF2LY, CXXC1P1, ABCB8, LOC285766, HRG, GPR143, MORC4, TCFL5, CASC2, POM121, CCDC116, RP11-402G3.5, TTC7B, LOC101927308, PTPRO, CEP19, AK054708, RP11-547D24.1, SGOL1, LOC646482, CTA-331P3.1, OGFRL1, LOC653786, |

---

OTOA, TIMM8A, MAST1, LDHAL6A, POMP, TMEM235, LOC101928850, SLC1A4, XRCC3, CTD-2313J17.5, HTR1B, LINC01153, RAP2C, PSG4, CPA2, LINC00592, REPIN1, TBC1D16, RAD54L2, TCP11, GRAP, AFP, GLRB, AL133493.2, NAGLU, LOC553103, LOC101928940, NXT2, LOC101930114, SALL4, LOC286121, MAFG-AS1, ZNF883, FAM71F1, PRKCQ, PARD3B, LOC101928259, LRRC58, FAM186B, LOC100505716, MPP1, PAN3-AS1, CRMP1, LINC01105, TG, LOC100287413, FAT4, LINC00305, PRIM2B, TTC26, NEURL3, AC005498.3, TFE3, SNHG17, GAGE12B, GAGE12F, GAGE12G, GAGE12I, GAGE4, GAGE5, GAGE6, GAGE7, MBL2, CT47A1, CT47A10, CT47A11, CT47A12, CT47A2, CT47A3, CT47A4, CT47A5, CT47A6, CT47A7, CT47A8, CT47A9, BAGE, HCG22, PLAGL2, GLB1L3, ADPRH, FUT1, USP31, FGFR1OP2, F8, ICK, LINC00189, KCNA10, HMGB1P4, ISY1-RAB43, LOC100506790, RP11-195M16.3, TRIM4, RPL36A, MRAP, PPP1R2, DNMT1L, IRAK1, TMEM107, LOC101928555, SNAI1, GPR123, PLEKHA5, RP11-109D24.1, C8orf88, LOH12CR1, TMEM185A, RNU2-22P, LOC100130278, RP11-319E16.2, AGXT2, JPH3, DCAF10, MINA, GJD3, SART3, SYNE3, ZBTB12, ALG10, ZNF337, TSEN15, SYN3, LOC101928869, LOC101929662, SPIN3, LOC101060091, TAB3, FBRSL1, OR5P2, PYCRL, MAP4K5, LOC101927552, MAS1, LOC101926916, WDHD1, ZFR2, PRIM2, RPA1, LOC100506351, LOC440792, TIMELESS, SLC7A5, LINC00622, ATP6V1E2, RAX, IGSF22, ZNF738, ZNF275, SLCO4C1, SMG5, LOC101060264, SHROOM2, WWOX, GHSR, MIR4435-1HG, CYTH3, ZNF251, RP5-1085F17.3, RP1-192P9.1, ZMYND15, MORF4L2-AS1, CYP4Z1, FMR1, LCA5L, LINC00599, MIR124-1, LINC00330, RP11-305L7.3, ARRB2, LINC00535, PTPN1, BC113958, ADAMTS12, GSN-AS1, CAPZA1, TONSL, LINC00545, ZNF837, RNGTT, LOC101060424, NOL10, TMEM170B, FAM58A, RPS4XP9, FUT7, LOC285857, WBP4, NUP153, NOM1, BC044614, LOC101929734, FHL3, ITGA9, IRF8, MACROD2-AS1, SMIM12, DKFZp667F0711, LOC100128281, FBF1, FKSG29, HEATR9, ITGA9-AS1, SLC6A20, MGC15705, TRPM3, ZHX3, CNN2, CEP41, LOC102467079, NAA20, C6orf62, DNHD1, RP4-539M6.14, RP3-327A19.5, GPR78, LINC01186, ERVH-1, LOC101927138, APEX2, TEX41, BC027619, RP11-236J17.3, SLC25A32, COBLL1, FAM230C, DPM1, RFD3, TMEM55A, ATP13A3, LOC101927820, LOC100505635, UBP1, TFDP3, OTUD6B, ZNF619, LOC100288490, CELP, SPC25, RP11-708J19.1, NFKBIE, CPSF2, C2orf81, RP11-960B9.2, RP11-

---

---

248J18.3, CYP4A22, LAGE3, ACPT, ALG5, NUPL1, GABRR2, VN1R5, CHAT, ND6, MGC10814, INPP5J, HERC5, LINC01122, GAGE12C, GAGE12D, GAGE12E, GAGE12H, GUCY2D, GOLT1B, TAS2R41, RP11-180N14.1, RP11-649A18.7, SMTNL2, SKIDA1, KB-431C1.5, C3orf27, XPO4, C11orf58, NEDD1, LOC100506791, NAALADL2, LOC101927123, TMEM156, LOC101928230, LOC100422737, WDR4, FAM122B, C17orf75, GUSBP5, SLFNL1-AS1, RAD51AP1, DUSP13, ZXDB, KRT84, EHD3, DUSP21, LOC101928516, RP11-255C15.3, BC028670, CDKN1B, UBAP1L, FBXW4P1, ZNF429, LINC01103, GAGE2A, GAGE2C, DLEU2, AK093362, RP11-774D14.1, LOC101926907, GAS6-AS1, PCDHB5, DAOA-AS1, TEF, BATF2, MCFD2, RIBC2, SH2D3C, CELSR1, CARD18, PAQR3, RP11-324L17.1, BC028044, OR51A1P, RP11-329B9.5, TSR1, MGC39545, RP11-31K23.2, LAG3, TNMD, OR8D1, AC090627.1, LOC100506860, PNMA2, CTD-2286N8.2, NKPD1, STARD13-AS, LOC100128840, SLC6A5, TMSB15A, TOP1MT, EVA1A, RP11-806L2.2, XPOT, RCE1, SAA4, HGH1, RP11-549J18.1, LOC339568, MOSPD1, MME, APOOL, MNAT1, LINC00334

**Downregulated  
(575)**

S100A5, PTPRF, YPEL3, PDCL2, ARHGEF28, HSD17B11, C3orf70, LOC100506235, ADRB1, REG4, NPY6R, TMEM41B, PCF11, RP11-360A18.2, SEMA4B, COLCA2, EPHA4, RP11-363E7.4, PAX4, TGFB3, DNAJC12, SERPINB5, TMEM26, 3-Mar, LOC101928417, SYT17, TRIM7, CD163L1, RP11-252E2.1, CTSE, PPP3CA, CLEC2L, ZADH2, IL1RAPL2, LOC93622, HSD17B2, MAGEC3, LINC01214, MIR6872, SPSB3, CD55, RAB27B, LOC101930241, CTB-113P19.1, KLKB1, LOC388780, PDK4, FRMD3, NOS1AP, TSPAN8, TRIM8, CDH19, AGPAT4-IT1, TRAV24, TMC7, MYBPC3, LOC101060405, PRG4, SMAD9, NOXA1, GDA, RHOBTB3, NME3, NGF, LINC01169, TNIK, ANKZF1, WDR38, CHGB, SRD5A2, CNGA4, ZNF488, LOC100129620, INSM1, EFNA5, ENO1-AS1, CYP3A5, BC036311, FEV, RP11-112J3.16, P4HA1, CATSPERB, DSG4, FETUB, LOC101928834, GATS, LRCH4, AK125860, RP11-582J16.4, ZNF302, OR10D1P, AGR3, PLA2G4A, LOC101930566, LOC102800447, MUC5AC, GABARAPL2, WISP3, LOC221272, BTBD10, MPC1, DNER, YTHDC1, OR2W1, C11orf52, HSPB2-C11orf52, RGS12, PDE9A, VSIG2, TLE1, ERVK13-1, SLC25A47, YPEL2, NOL3, SCG5, RP11-109M19.1, GAD1, NEUROG3, LOC284112, MIR195, MIR497, MIR497HG, STKLD1, CHST6, SKIV2L2, SPG11, LOC102724257, UNC13B, LOC101929172, NUDT22, FHL2, KIZ, SAMD5, ANXA2P2, HADHB, C19orf33, RASAL1,

---

---

ARHGAP32, RFESD, SNORA37, PGM2L1, SSTR5-AS1, RP11-757F18.5, LOC101928099, GRAMD1B, SMCO4, OR2L13, CAPN12, CXorf30, SLC25A34, AX746710, OVOL1-AS1, KLK11, PCSK1, ABCC3, KCNMA1, NXF3, PAX6, MED7, QRIC1, CCIN, MYOF, UNC93B1, FAM181A-AS1, GMPR, MLPH, CYP2E1, PRUNE2, CTD-2311B13.7, P775P, KIAA1244, HMGCS2, ERGIC1, AP001062.7, CLEC4G, RP1L1, RANBP17, MIR4755, LOC644135, RAB3C, LINC00282, FGFR2, LOC100422781, U2AF1L4, MTCL1, DUSP4, LOC286359, CCDC174, SIDT2, ARL14, LOC101930052, LOC102724562, MST1P2, EEF2K, LOC101930123, YIPF1, LOC101927579, LOC101928042, AUH, NR1H4, NPW, PRKAG2-AS1, MC5R, OR7C2, C14orf180, TPH1, ACER3, CIB1, DHRS4-AS1, CCDC68, BAZ2B, LOC101930301, LOC101930303, TRIM16L, DMKN, LMF1, TAS2R16, NELL2, CACNA1C, TMEM167B, RP5-894A10.6, SSPO, LINC00261, C4BPB, AKAP7, RBM12B-AS1, CRYBA2, LOC101928519, PABPC5, KLK10, ERN2, SYT13, LOC654780, NQO1, INHBB, CDKN2D, DKK1, LOC153682, CACNB2, TMEM159, NT5E, CCDC90B, DLG4, AX747826, ALS2CL, NOSTRIN, RNF125, TFAP2B, MIR6824, C6orf163, GSN, TRAPPC12, SHC2, ZNF688, ZNF284, TMEM88, USP3-AS1, WNT9A, TSHZ1, CCDC140, RASSF6, ARHGEF4, MT1E, AJ606316, MROH7, PLLP, DMRTA2, LOC728084, IFNGR1, MTMR14, LOC100130417, PLA2G2A, HYPK, PLCXD3, ZBTB34, HOXD3, LOC401021, MIR1282, SERF2, KIAA0895, FAM155B, LOC102725213, TCEB1P3, IP6K2, C15orf43, MCU, LOC286382, CCDC60, B3GNT6, RSPO4, PHPT1, ARX, CHMP1B, ZSWIM6, WDR37, CAMK2D, GRIK4, MUC1, EFCAB4B, ANKRD49, DYNC1LI2, SMAD5-AS1, BAIAP3, SATB1, AC002310.12, AK056973, DUS3L, CX3CL1, HAVCR1, RARRES1, CBY1, C2orf72, INSR, CFC1, MKL2, CCDC153, LENG9, RP11-402D21.2, FAM222B, JMJD1C, NEDD4L, ACSM3, CCL27, CIB4, AQP7, LOC100509620, LOC101930168, LOC284661, FOXN4, SLC18B1, MBOAT2, LOC101928098, WISP2, C15orf52, RALBP1, CADPS2, KLHL3, LOC400620, MARVELD3, CCDC173, RP11-161D15.1, SCGN, NPTX1, RP11-3304.1, PTPRH, ACBD5, CAMP, LOC283737, DNAH12, AF086126, SLC35A1, LINC00265, ZNF692, FMO5, LINC00887, RP11-747H7.3, DYDC2, AKR1C1, ARHGAP36, CDSN, TSPAN1, CARD6, DNAI1, SLC30A10, MST1R, PPP1R12B, ZNF114, SPTSSB, TM4SF4, AKAP5, MYBPC1, CACNA1F, EPB41L4A, CTDP1, GCG, DNMI1P35, SLC35D3, GABRA3, IRGM, RBFA, HECA, FLRT3, ZBTB7C, CDK5RAP3, FOXO4, SLC16A9,

---



---

RABAC1, BIRC2, FAM179A, TIPARP, FLJ00290, MGLL, LINC00529, ITGB2-AS1, ZNF805, AGR2, HNRNPA1P37, CHGA, SLC5A9, C11orf89, ANG, NDUFS4, PTGER2, C11orf30, ARRDC2, CD1D, MGC27382, TBXAS1, ZFH3, MB21D1, LINC00948, DNAJC4, FAM124B, TBC1D17, MUC4, TAGLN3, RGS20, OCEL1, LINC01007, APOA5, RBM43, PDE6H, VSIG10L, LOC101928837, LOC101927526, HGD, HEPACAM2, EPS8L3, MYO7B, TCN1, SEC14L4, ADH1A, SLC25A2, LOC101928676, MAEA, FUT10, LOC101927330, TNNT1, AY940074, VNN1, EFCAB4A, NBEA, JAG1, RP11-288L9.1, OSBP2, SPON1, ALAS2, LOC100506411, LOC100505592, SLC27A1, RP11-395B7.2, FAM160A2, TEC, ARAP1, SCG2, KCNG3, OR12D2, MAEL, ADAM32, PSG5, PPP6R3, TNFRSF11A, AP1G2, PPP1R11, SNORD23, RP6-24A23.7, ERCC6, PDXDC1, OBFC1, SYT8, SAP30L, ZNF180, CXorf58, NPIP15, CRNN, UGP2, DUOXA2, CFD, ACTN3, RP11-710C12.1, C11orf80, LMNA, SLC12A6, TFG, FAM189A1, GNPAT, MAPK8, PTRHD1, AKR1C2, LOC101930400, HIPK2, SLC6A14, CLRN3, WBP2NL, CYSTM1, D21S2088E, PHEX, ZNF791, MXD3, IFNA1, DUOX1, CCDC81, CPS1-IT1, HMP19, LOC574538, MTMR9LP, BNIP3L, PNPLA7, AMN, SLC16A14, PPP1R36, KRT2, PPP1R9A, NPSR1-AS1, ITGB6, LOC100505984, FAM212A, DNAJC17, PP12708, SESTD1, LOC101930097, MFS11, COQ2, MALAT1, SRPK3, BC047615, CDS1, CIRBP, FBXO32, AX747517, RAC3, NUDT12, MPRIP-AS1, SRD5A3, MPP2, SMC1B, GPR144, ELOVL3, HTR2B, GLRX, LINC00881, HSPA2, ADORA1, KBTBD3, C11orf54, FRMD1, RP11-254F7.1, BPIFB1, DNAJC16, ABI1, S100P, GPRC5A, SYTL2, IVNS1ABP, ABCA1, KCP, RP4-594L9.2, HOXB7, ALOX5, CDK6, CCDC37, NCOA4, UFC1, MT1HL1, YIPF2, PRSS2, HPCA, LIPG, GJB5, MATN4, SCNN1G, LOC101928583, PLEKHN1, SULT1C2, RAB26

---
